# Supplementary material for: Molecular design approach of increasing the triplet energy of host materials using pyrrole as a core structure
Source: Royal Society of Chemistry journal article supplement (doi:10.1039/c5ra17469d), 2015-01-01
Supplement: c5ra17469d1.pdf [file c5ra17469d1.pdf]

Supporting information

## **Molecular design approach of increasing the triplet energy of host materials using pyrrole as a core structure**

**Mounggon kim<sup>1</sup>, Sang Kyu Jeon<sup>2</sup>, Jun Yeob Lee<sup>2\*</sup>**

<sup>1</sup>Department of Polymer Science and Engineering, Dankook University  
152, Jukjeon-ro, Suji-gu, Yongin-si, Gyeonggi-do, 448-701, Korea

<sup>2</sup>School of Chemical Engineering, Sungkyunkwan University  
2066, Seobu-ro, Jangan-gu, Suwon-si, Gyeonggi-do, 440-746, Korea

Fax: (+) 82-31-299-4716

E-mail: leej17@skku.edu

List of tables

Table S1. Calculated Gaussian data of PPyCz2, 27PTCz and 36PTCz

Table S1.

|                | PPyCz2   | 27PTCz   | 36PTCz   |
|----------------|----------|----------|----------|
| LUMO           | -0.74 eV | -1.20 eV | -1.20 eV |
| HOMO           | -5.52 eV | -5.20 eV | -5.17 eV |
| Band Gap       | 4.78 eV  | 4.00 eV  | 3.97 eV  |
| Triplet energy | 3.18 eV  | 2.89 eV  | 3.06 eV  |

## List of figures

Figure S1. Thermal properties of PPyCz2.

Figure S2. Mass data of 2,5-Dibromo-1-phenyl-1H-pyrrole.

Figure S3. Mass data of PPyCz2.

Figure S4. a) Power efficiency – luminance curves of PPyCz2. b) Current efficiency – luminance curves of PPyCz2.

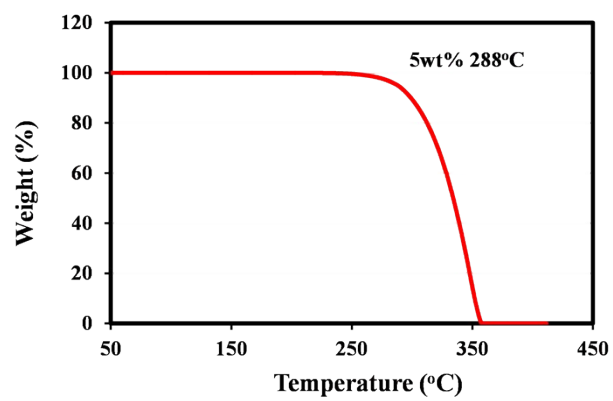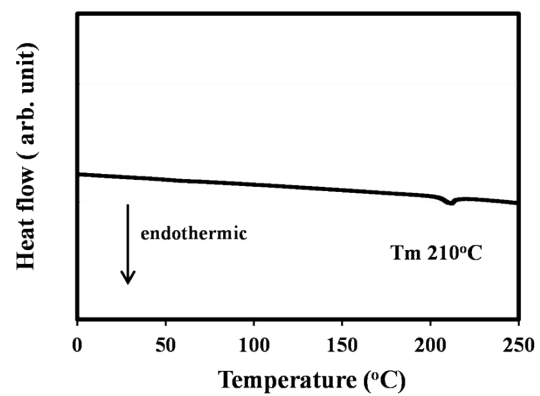

Figure S1.

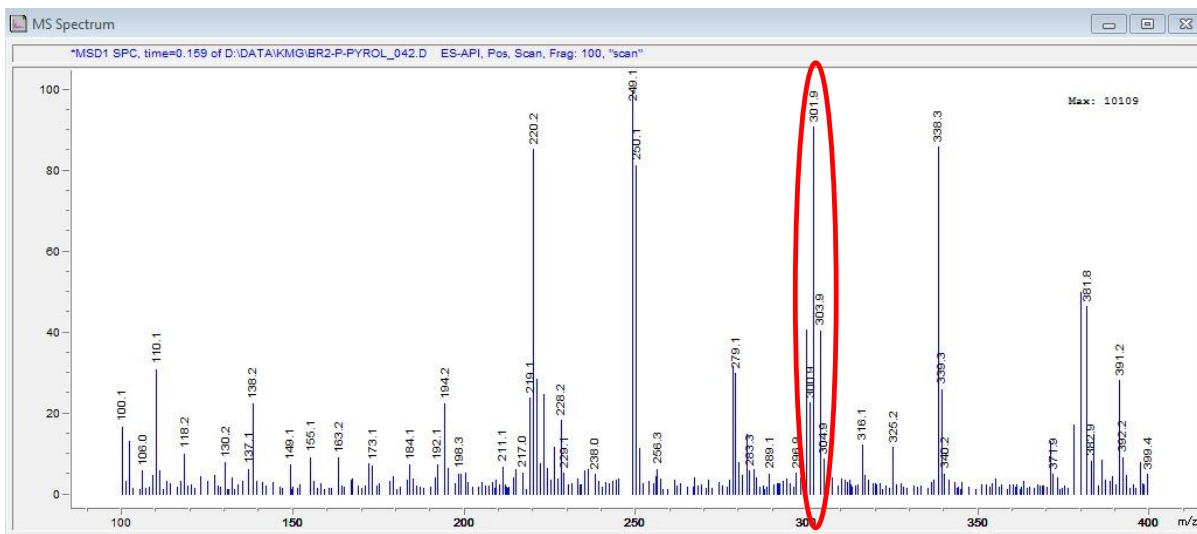

Figure S2.

Spectrum RT 2.79 - 3.05 (49 scans) - Background Subtracted 1.46 - 2.11  
KMG-12 2015.10.09 14:22:03 ;  
APCI + Max: 1.6E8

Intensity

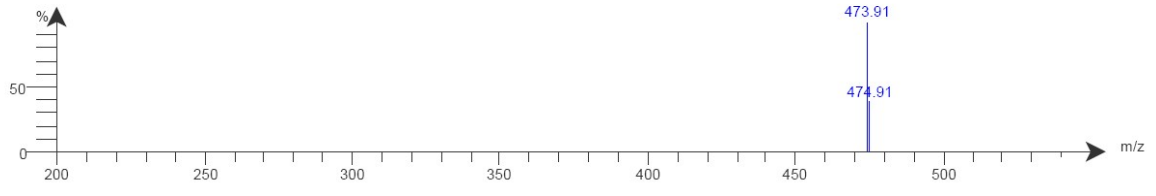

Figure S3.

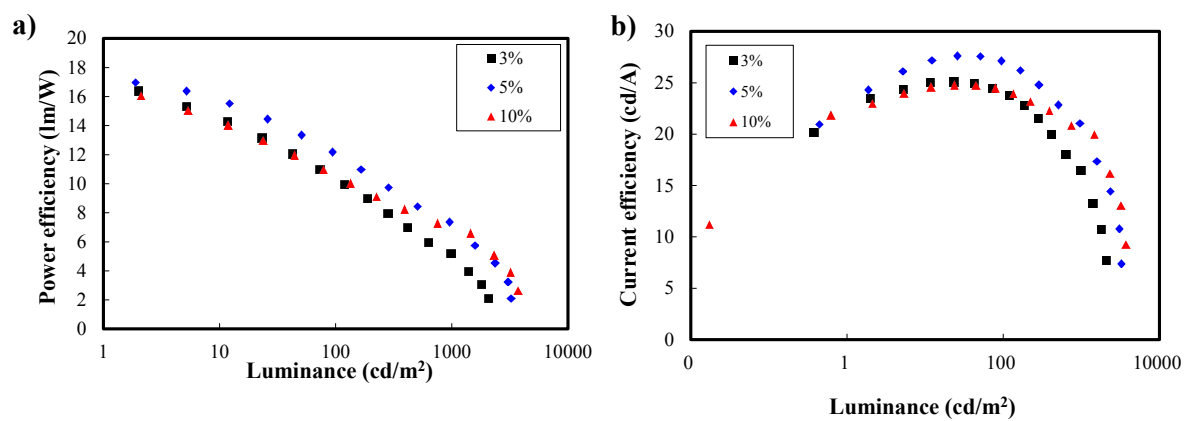

Figure S4.
